# Supplementary material for: A Drosera-bioinspired hydrogel for catching and killing cancer cells
Source: PubMed Central journal article supplement (PMC4585793; doi:10.1038/srep14297), 2015-09-23
Supplement: srep14297-s1.pdf [file srep14297-s1.pdf]

Supporting Information

**A *Drosera*-bioinspired hydrogel for catching and killing cancer cells**

Shihui Li, Niancao Chen, Erin R. Gaddes, Xiaolong Zhang, Cheng Dong, Yong Wang\*

Department of Biomedical Engineering, College of Engineering, Pennsylvania State University,

University Park, Pennsylvania 16802-6804

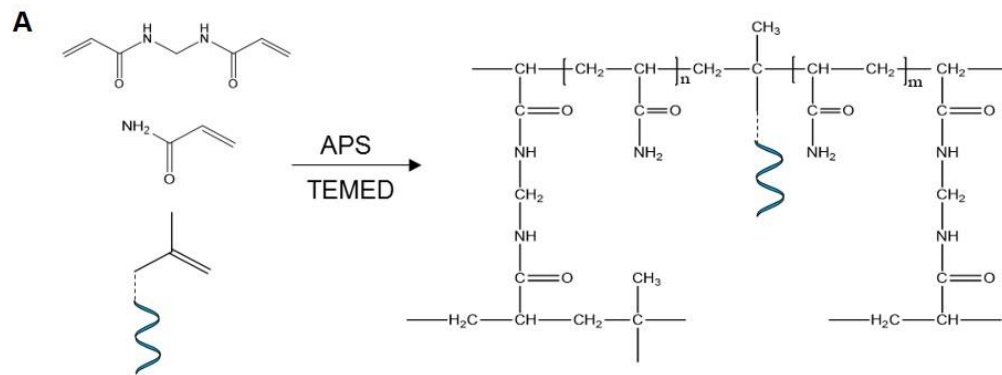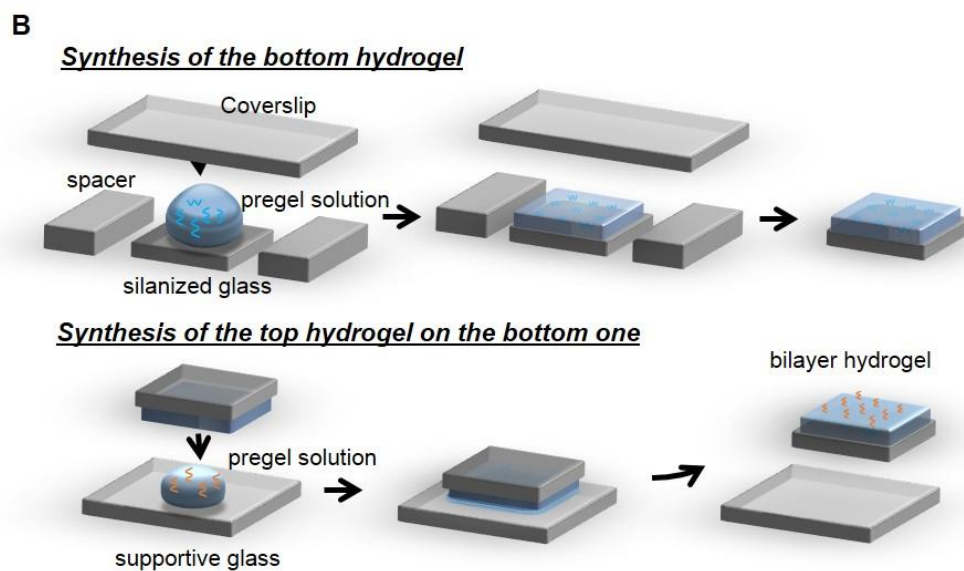

**Figure S1.** (A) Synthesis of the hydrogel. (B) Procedure of the bilayer hydrogel fabrication.

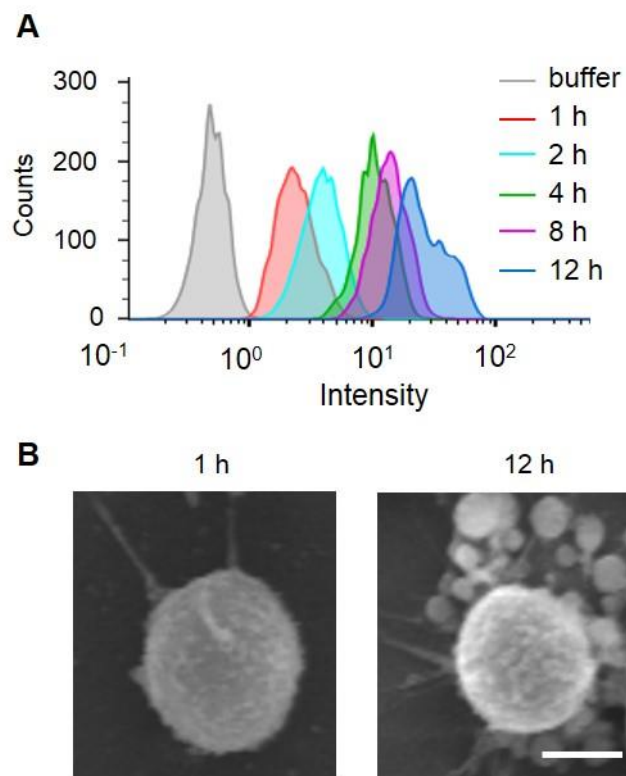

**Figure S2.** (A) Flow cytometry histogram showing the relationship of drug uptake versus time. Cells were harvested from the hydrogel at different cell residence time points. (B) SEM images of the cells on the Dox (+) hydrogel after 1-h and 12-h residence. Scale bars: 5  $\mu$ m.

**Table 1.** DNA sequences.

| DNA                      | 5'-3'                                                                           |
|--------------------------|---------------------------------------------------------------------------------|
| Acrydite-ID <sub>1</sub> | Acrydite-T*T*T*T*C*C*A*T*C*T*C*C*T*T*C*C*T*C*T*C*T*T*C*T*T*C*C*T/3InvdT/        |
| ID <sub>1</sub>          | T*T*T*T*C*C*A*T*C*T*C*C*T*T*C*C*T*C*T*C*T*T*C*T*T*C*C*T/3InvdT/                 |
| CD <sub>1</sub>          | TCTAACTGCTGCGCCGCCGGGAAAATACTGTACGGTTAGATATATAGG<br>AAGAAGAGAGGAAGGAGATGGAA     |
| FAM-CD <sub>1</sub>      | FAM-TCTAACTGCTGCGCCGCCGGGAAAATACTGTACGGTTAGATATATAGGA<br>AGAAGAGAGGAAGGAGATGGAA |
| Acrydite-ID <sub>2</sub> | Acrydite-GCAGCAGCAGCAGCAGCAAAA                                                  |
| ID <sub>2</sub>          | GCAGCAGCAGCAGCAGCAAAA                                                           |
| CD <sub>2</sub>          | TTTTGCTGCTGCTGCTGCTGC                                                           |
| Cy5.5-CD <sub>2</sub>    | Cy5.5-TTTTGCTGCTGCTGCTGCTGC                                                     |

\* *Phosphorothiolated base*

ID: *Immobilizing DNA*

CD: *complementary DNA*

CD<sub>1</sub> *is the aptamer for cell catch.*
